Title: PULSE OXIMETRY MAY NOT DETECT ENDOBRONCHIAL INTUBATION

Authors: S. J. Barker, Ph.D., M.D., K. K. Tremper, Ph.D., M.D., J. Hyatt, B.S., J. Zaccari, B.S., and T. B. Thauere, B.S.

Affiliation: Department of Anesthesiology, University of California, Irvine, Medical Center, Orange, California 92668 and American Bentley, Inc., Irvine, California 92714

**Introduction.** Arterial oxygen saturation monitoring by pulse oximetry is rapidly becoming a standard of practice for general anesthesia. The rapid, reliable detection of inadvertent endobronchial intubation is an important goal of oxygen monitoring. In a previous study of pulse oximetry, only five of nineteen thoracotomy patients developed significant desaturations during one-lung ventilation (OLV) at an  $FI_{O_2}$  of 1.0.<sup>1</sup> In a similar study at  $FI_{O_2} = 0.5$ , the mean pulse oximeter saturation ( $SpO_2$ ) fell by 3.4% after four minutes of OLV.<sup>2</sup> Inadvertent endobronchial intubation during anesthesia generally occurs at  $FI_{O_2}$  greater than 0.3, and it is unclear a priori whether pulse oximetry will reliably detect these events. This is the purpose of the present study.

**Methods.** Four dogs were anesthetized with sodium pentobarbital and intubated endotracheally. Arterial and central venous cannulae were inserted through a femoral incision. Two pulse oximeter probes (Novamatrix 500 and Nellcor N-100) were applied to each subject, one to the tongue and one to a toe-web. Transcutaneous  $PO_2$  ( $PtcO_2$ ) was monitored by two probes (Novamatrix 805) on the chest. In addition, arterial  $PO_2$  was continuously monitored by an intra-arterial "optode" fluorescence quenching probe made by American Bentley.<sup>3</sup> Arterial samples were also drawn periodically for blood gas analysis. After establishing steady-state conditions for two lung ventilation, OLV was achieved by guiding the endotracheal tube into the right mainstem bronchus with a flexible bronchoscope. Data were recorded at regular intervals for 20 minutes of OLV, during which normocapnia was maintained. The experiment was repeated for five  $FI_{O_2}$  values for each dog.

**Results.** Results of a typical endobronchial intubation at an  $FI_{O_2}$  of 0.5 are shown in Figure 1.  $PaO_2$  determined by blood gas analysis or by the optode ( $OpPO_2$ ) begins to fall immediately, and  $PtcO_2$  begins to fall in less than one minute.  $SpO_2$  did not decrease significantly in this case, and fell by an average of 4% ( $\pm 4.1\%$  std dev) for all dogs at  $FI_{O_2} = 0.5$ . Meanwhile,  $PtcO_2$  fell by an average of 42% and  $OpPO_2$  by 64% at this  $FI_{O_2}$ . At  $FI_{O_2} = 1.0$ , the mean decrease in  $SpO_2$  was 1.3% ( $\pm 2.1\%$ ), while  $PtcO_2$  decreased by 64% and  $OpPO_2$  by 79%. The results for all  $FI_{O_2}$  values are summarized in Table 1, which shows mean percentage changes ( $\pm$  std dev) in each variable following the onset of OLV. Each of these changes is an average of data from all four dogs.

**Discussion.** Oxygen monitoring by pulse oximetry is increasingly relied upon to warn of hypoxia during endotracheal anesthesia. Inadvertent endobronchial intubation is a common event that may lead to hypoxia and postoperative complications. The results of this study show that this event may not be reliably detected by pulse oximetry at elevated  $FI_{O_2}$  values, with the probability of detection decreasing with increasing  $FI_{O_2}$ . There is wide variation among subjects, and some may show little desaturation even

at  $FI_{O_2} = 0.3$ . Transcutaneous  $PO_2$  shows a significant fall at all  $FI_{O_2}$  values within two minutes. The intra-arterial optode shows the most rapid and significant change of the three oxygen monitors evaluated.

**References.**

1. Brodsky J, et al.: Pulse oximetry during one-lung ventilation. *Anesthesiology* 63:212-214, 1985
2. Viitanen A, et al.: Comparison of transcutaneous oxygen tension measurement and pulse oximetry during one-lung ventilation. *Anesthesiology* 65:3A, A482, 1986
3. Barker S, et al: Continuous fiberoptic arterial oxygen tension measurements in dogs. *J Clin Monit* 3:48-52, 1987

Table 1. Mean percentage decreases ( $\pm$  standard deviation) of oxygenation variables during OLV.

| $FI_{O_2}\%$ | $PaO_2$              | $Op-PO_2$            | $NSaO_2$              | $PtcO_2$             |
|--------------|----------------------|----------------------|-----------------------|----------------------|
| 100          | 68.3<br>( $\pm 15$ ) | 79.3<br>( $\pm 10$ ) | 1.3<br>( $\pm 2.1$ )  | 63.8<br>( $\pm 13$ ) |
| 50           | 62.0<br>( $\pm 14$ ) | 63.8<br>( $\pm 8$ )  | 4.0<br>( $\pm 4.1$ )  | 42.2<br>( $\pm 13$ ) |
| 30           | 55.1<br>( $\pm 13$ ) | 45.2<br>( $\pm 7$ )  | 6.0<br>( $\pm 6.3$ )  | 32.9<br>( $\pm 22$ ) |
| 20           | 37.6<br>( $\pm 7$ )  | 41.0<br>( $\pm 6$ )  | 9.8<br>( $\pm 6.1$ )  | 31.2<br>( $\pm 10$ ) |
| <20          | 32.0                 | 36.5<br>( $\pm 6$ )  | 19.0<br>( $\pm 5.0$ ) | 40.0<br>( $\pm 9$ )  |

Figure 1. Oxygenation variables vs. time from OLV onset.

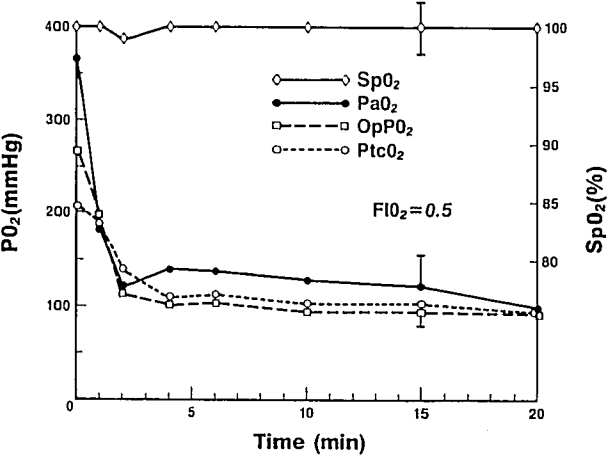

Source: https://asa2.silverchair.com/anesthesiology/article-pdf/67/3/A170/634908/0000542-198709001-00170.pdf
